# Supplementary material for: Transmission of Norwegian reindeer CWD to sheep by intracerebral inoculation results in an unusual phenotype and prion distribution
Source: Springer Nature journal article supplement (doi:10.1186/s13567-024-01350-6), 2024-07-29
Supplement: MOESM2 [file 13567_2024_1350_MOESM2_ESM.pdf]

**RHs - 12 mpi**

90501  
90506  
90507  
90525  
90542  
90530

+ + + + + +

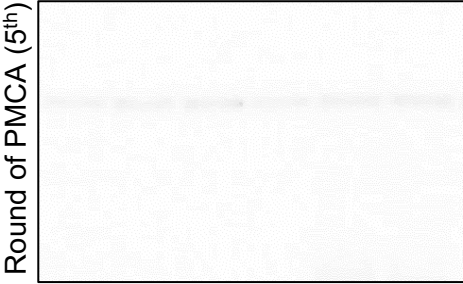

**RHs - 18 mpi**

90501  
90506  
90507  
90525  
90542

+ + + + +

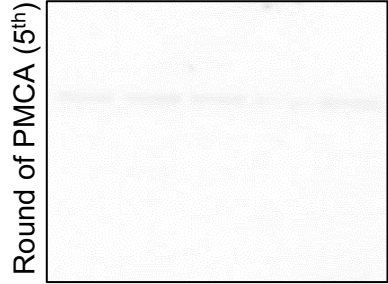

**RHs - 24 mpi**

90501  
90506  
90507  
90525  
90542

+ + + + +

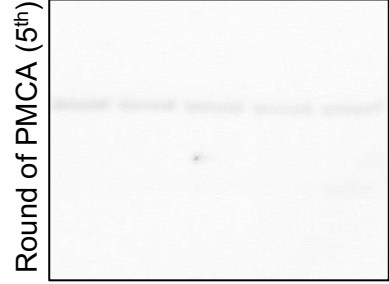

PK  
50µg/mL  
28kDa

**RHs - 30 mpi**

90501  
90506  
90507  
90525  
90542

+ + + + +

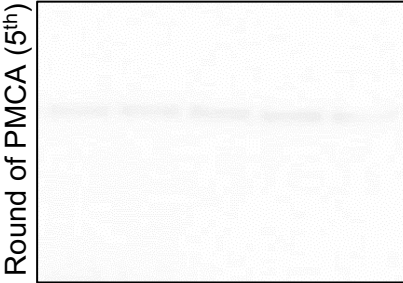

**RHs - 36 mpi**

90501  
90506  
90507  
90525

+ + + +

RH healthy sheep  
RH c. scrapie sheep

+ +

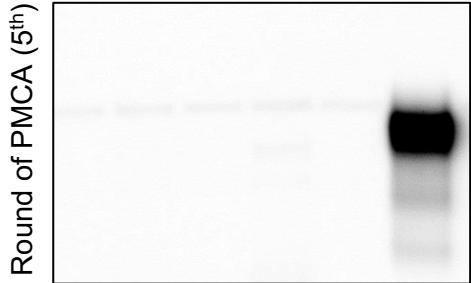

PK  
50µg/mL  
28kDa
