# Supplementary material for: Transmission of Norwegian reindeer CWD to sheep by intracerebral inoculation results in an unusual phenotype and prion distribution
Source: Springer Nature journal article supplement (doi:10.1186/s13567-024-01350-6), 2024-07-29
Supplement: MOESM4 [file 13567_2024_1350_MOESM4_ESM.pdf]

### Vacuolation scores

|                | Obex | Pons | Mesencephalon | Thalamus | Cerebral cortex | Cerebellar peduncle | Cerebellum – central WM | Capsula interna | Corpus callosum |
|----------------|------|------|---------------|----------|-----------------|---------------------|-------------------------|-----------------|-----------------|
| 90530          | 0.0  | 0.0  | 0.0           | 0.0      | 0.0             | 0.0                 | 0.5                     | 0.0             | 0.5             |
| 90542          | 1.0  | 0.0  | 0.5           | 0.5      | 0.0             | 0.5                 | 0.5                     | 0.5             | 1.0             |
| 90501          | 1.0  | 0.5  | 1.0           | 0.5      | 0.0             | 1.0                 | 1.0                     | 2.0             | 3.0             |
| 90506          | 0.5  | 0.0  | 0.5           | 1.0      | 0.0             | 1.0                 | 3.0                     | 2.0             | 3.0             |
| 90507          | 0.0  | 0.0  | 2.0           | 0.5      | 0.0             | 2.0                 | 2.0                     | 3.0             | 3.0             |
| 90525          | 0.0  | 1.0  | 1.0           | 2.0      | 0.0             | 1.0                 | 1.0                     | 1.0             | 2.0             |
| Non inoculated | 0.0  | 0.5  | 0.0           | 0.0      | 0.0             | 0.0                 | 0.5                     | 0.5             | 0.5             |

Animal

CNS region
