# Supplementary material for: Transmission of Norwegian reindeer CWD to sheep by intracerebral inoculation results in an unusual phenotype and prion distribution
Source: Springer Nature journal article supplement (doi:10.1186/s13567-024-01350-6), 2024-07-29
Supplement: MOESM5 [file 13567_2024_1350_MOESM5_ESM.pdf]

| Animal       | Liver                                                  |                   |               |                 |      |               | Serum           |                                                 |    |                 |
|--------------|--------------------------------------------------------|-------------------|---------------|-----------------|------|---------------|-----------------|-------------------------------------------------|----|-----------------|
|              | Concentration in mg/kg (wet mass)<br>(Reference range) |                   |               |                 |      |               | Age<br>(months) | Concentration in<br>umol/l<br>(Reference range) |    | Age<br>(months) |
|              | Fe<br>(35-350)                                         | Co<br>(0.025-0.1) | Cu<br>(6-150) | Se<br>(0.02-25) | Mo   | Pb<br>(0-4.1) |                 | Cu<br>(9-25)                                    |    |                 |
| <b>90530</b> | 140                                                    | 0.059             | 24            | 0.39            | 0.85 | <0.02         | 20              | 22.8                                            | 20 |                 |
| <b>90542</b> | 130                                                    | 0.051             | 58            | 0.41            | 1.4  | 0.034         | 34              | 17                                              | 32 |                 |
| <b>90525</b> | 140                                                    | 0.058             | 37            | 0.42            | 1.2  | <0.02         | 45              | 13.7                                            | 39 |                 |
| <b>90506</b> | 65                                                     | 0.071             | 49            | <0.009          | 1.2  | <0.02         | 45              | 16.7                                            | 32 |                 |
| <b>90507</b> | 120                                                    | 0.053             | 120           | 0.48            | 1.1  | <0.02         | 45              | 18.7                                            | 32 |                 |
| <b>90501</b> | 180                                                    | <0.02             | 87            | 0.30            | 0.57 | <0.02         | 45              | 15.5                                            | 32 |                 |
