# Supplementary material for: Transmission of Norwegian reindeer CWD to sheep by intracerebral inoculation results in an unusual phenotype and prion distribution
Source: Springer Nature journal article supplement (doi:10.1186/s13567-024-01350-6), 2024-07-29
Supplement: MOESM6 [file 13567_2024_1350_MOESM6_ESM.pdf]

6<sup>th</sup> Round of

PMCA

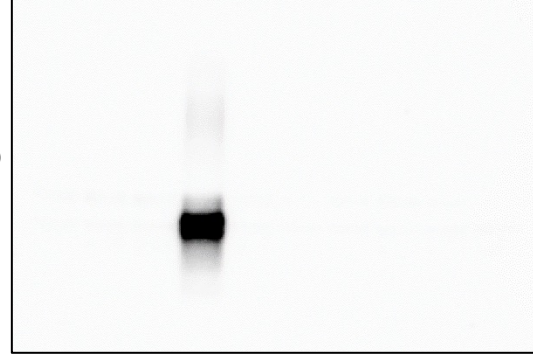

+ 90506: Midbrain/Diencephalon Hj5  
 + 90506: Distal medulla oblongata Hj8  
 + 90506: Cervical spinal cord RmC  
 + 90506: Thoracal spinal cord RmT  
 + 90506: Parotideal PLn  
 + 90506: Superficial cervical SCLn  
 + 90506: Distal jejunal DjLn  
 + 90507: Spleen Mi  
 + 90507: Midbrain/Diencephalon Hj5  
 + 90507: Cerebellum Hj6

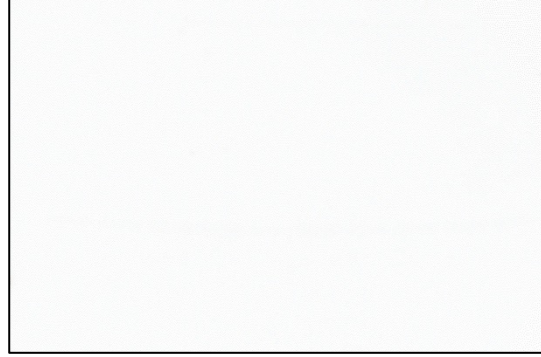

+ 90507: Distal medulla oblongata Hj8  
 + 90507: Cervical spinal cord RmC  
 + 90507: Thoracal spinal cord RmT  
 + 90507: Retropharyngeal RPLn  
 + 90525: Superficial cervical SCLn  
 + 90525: Spleen Mi  
 + 90525: Frontal cortex Hj2  
 + 90525: Midbrain/Diencephalon Hj5  
 + 90525: Cerebellum Hj6  
 + 90525: Distal medulla oblongata Hj8

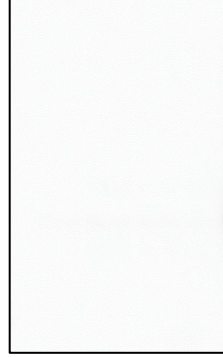

+ 90525: Cervical spinal cord RmC  
 + 90507: Superficial cervical SCLn  
 + 90525: Distal jejunal DjLn  
 + 90506: Spleen Mi

PK  
50µg/mL

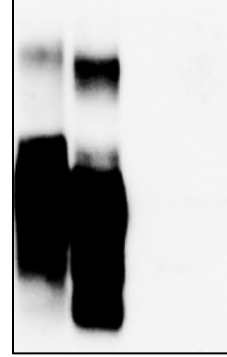

+ Obex c. scrapie  
 + Lymph node c. scrapie  
 + Obex healthy control  
 + Lymph node healthy control

PK  
50µg/mL

28kDa

6<sup>th</sup> Round of

PMCA

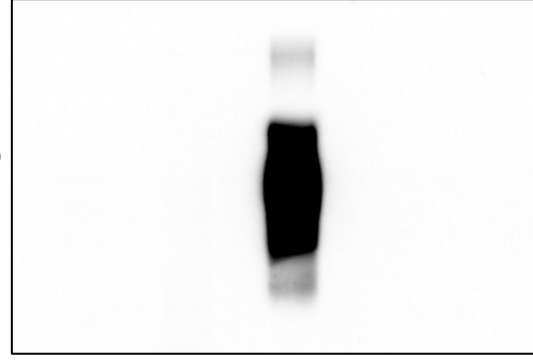

+ 90506: Frontal cortex Hj2  
 + 90506: Cerebellum Hj6  
 + 90506: Retropharyngeal RPLn  
 + 90507: Frontal cortex Hj2  
 + 90507: Parotideal PLn  
 + 90507: Distal jejunal DjLn  
 + 905030: Cervical spinal cord RmC  
 + 90530: Distal medulla oblongata Hj8  
 + 90530: Retropharyngeal RPLn  
 + 90542: Thoracal spinal cord RmT

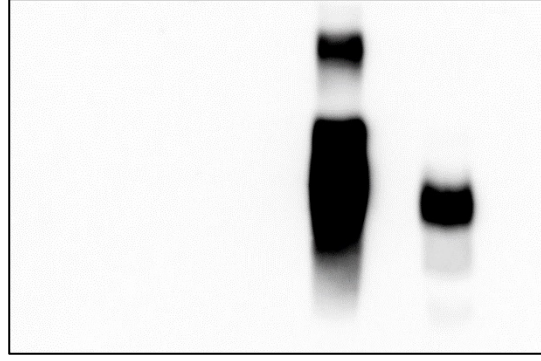

+ 90542: Retropharyngeal RPLn  
 + 90542: Parotideal PLn  
 + 90542: Superficial cervical SCLn  
 + 90501: Thoracal spinal cord RmT  
 + 90501: Cerebellum Hj6  
 + 90501: Distal medulla oblongata Hj8  
 + 90501: Parotideal PLn  
 + 90525: Thoracal spinal cord RmT  
 + 90525: Retropharyngeal RPLn  
 + 90525: Parotideal PLn

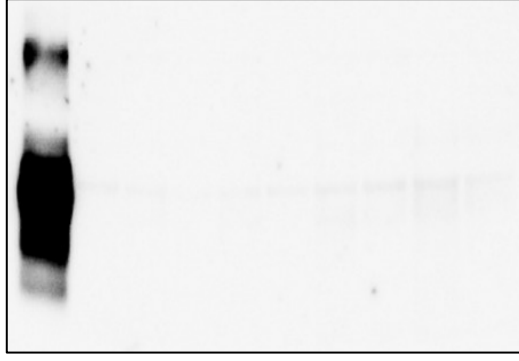

+ 90530: Frontal cortex Hj2  
 + 90530: Hippocampus Hj4  
 + 90530: Cerebellum Hj6  
 + 90530: Parotideal PLn  
 + 90530: Superficial cervical SCLn  
 + 90530: Distal jejunal DjLn  
 + 90530: Spleen Mi  
 + 90542: Frontal cortex Hj2  
 + 90542: Midbrain/Diencephalon Hj5  
 + 90542: Cerebellum Hj6

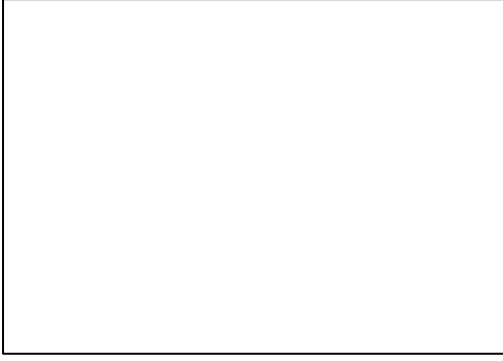

+ 90542: Distal medulla oblongata Hj8  
 + 90542: Cervical spinal cord RmC  
 + 90542: Distal jejunal DjLn  
 + 90542: Spleen Mi  
 + 90501: Frontal cortex Hj2  
 + 90501: Midbrain/Diencephalon Hj5  
 + 90501: Cervical spinal cord RmC  
 + 90501: Retropharyngeal RPLn  
 + 90501: Superficial cervical SCLn  
 + 90501: Distal jejunal DjLn

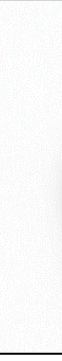

+ 90501: Spleen Mi

PK  
50µg/mL  
28kDa
