# Supplementary material for: Transmission of Norwegian reindeer CWD to sheep by intracerebral inoculation results in an unusual phenotype and prion distribution
Source: Springer Nature journal article supplement (doi:10.1186/s13567-024-01350-6), 2024-07-29

# A

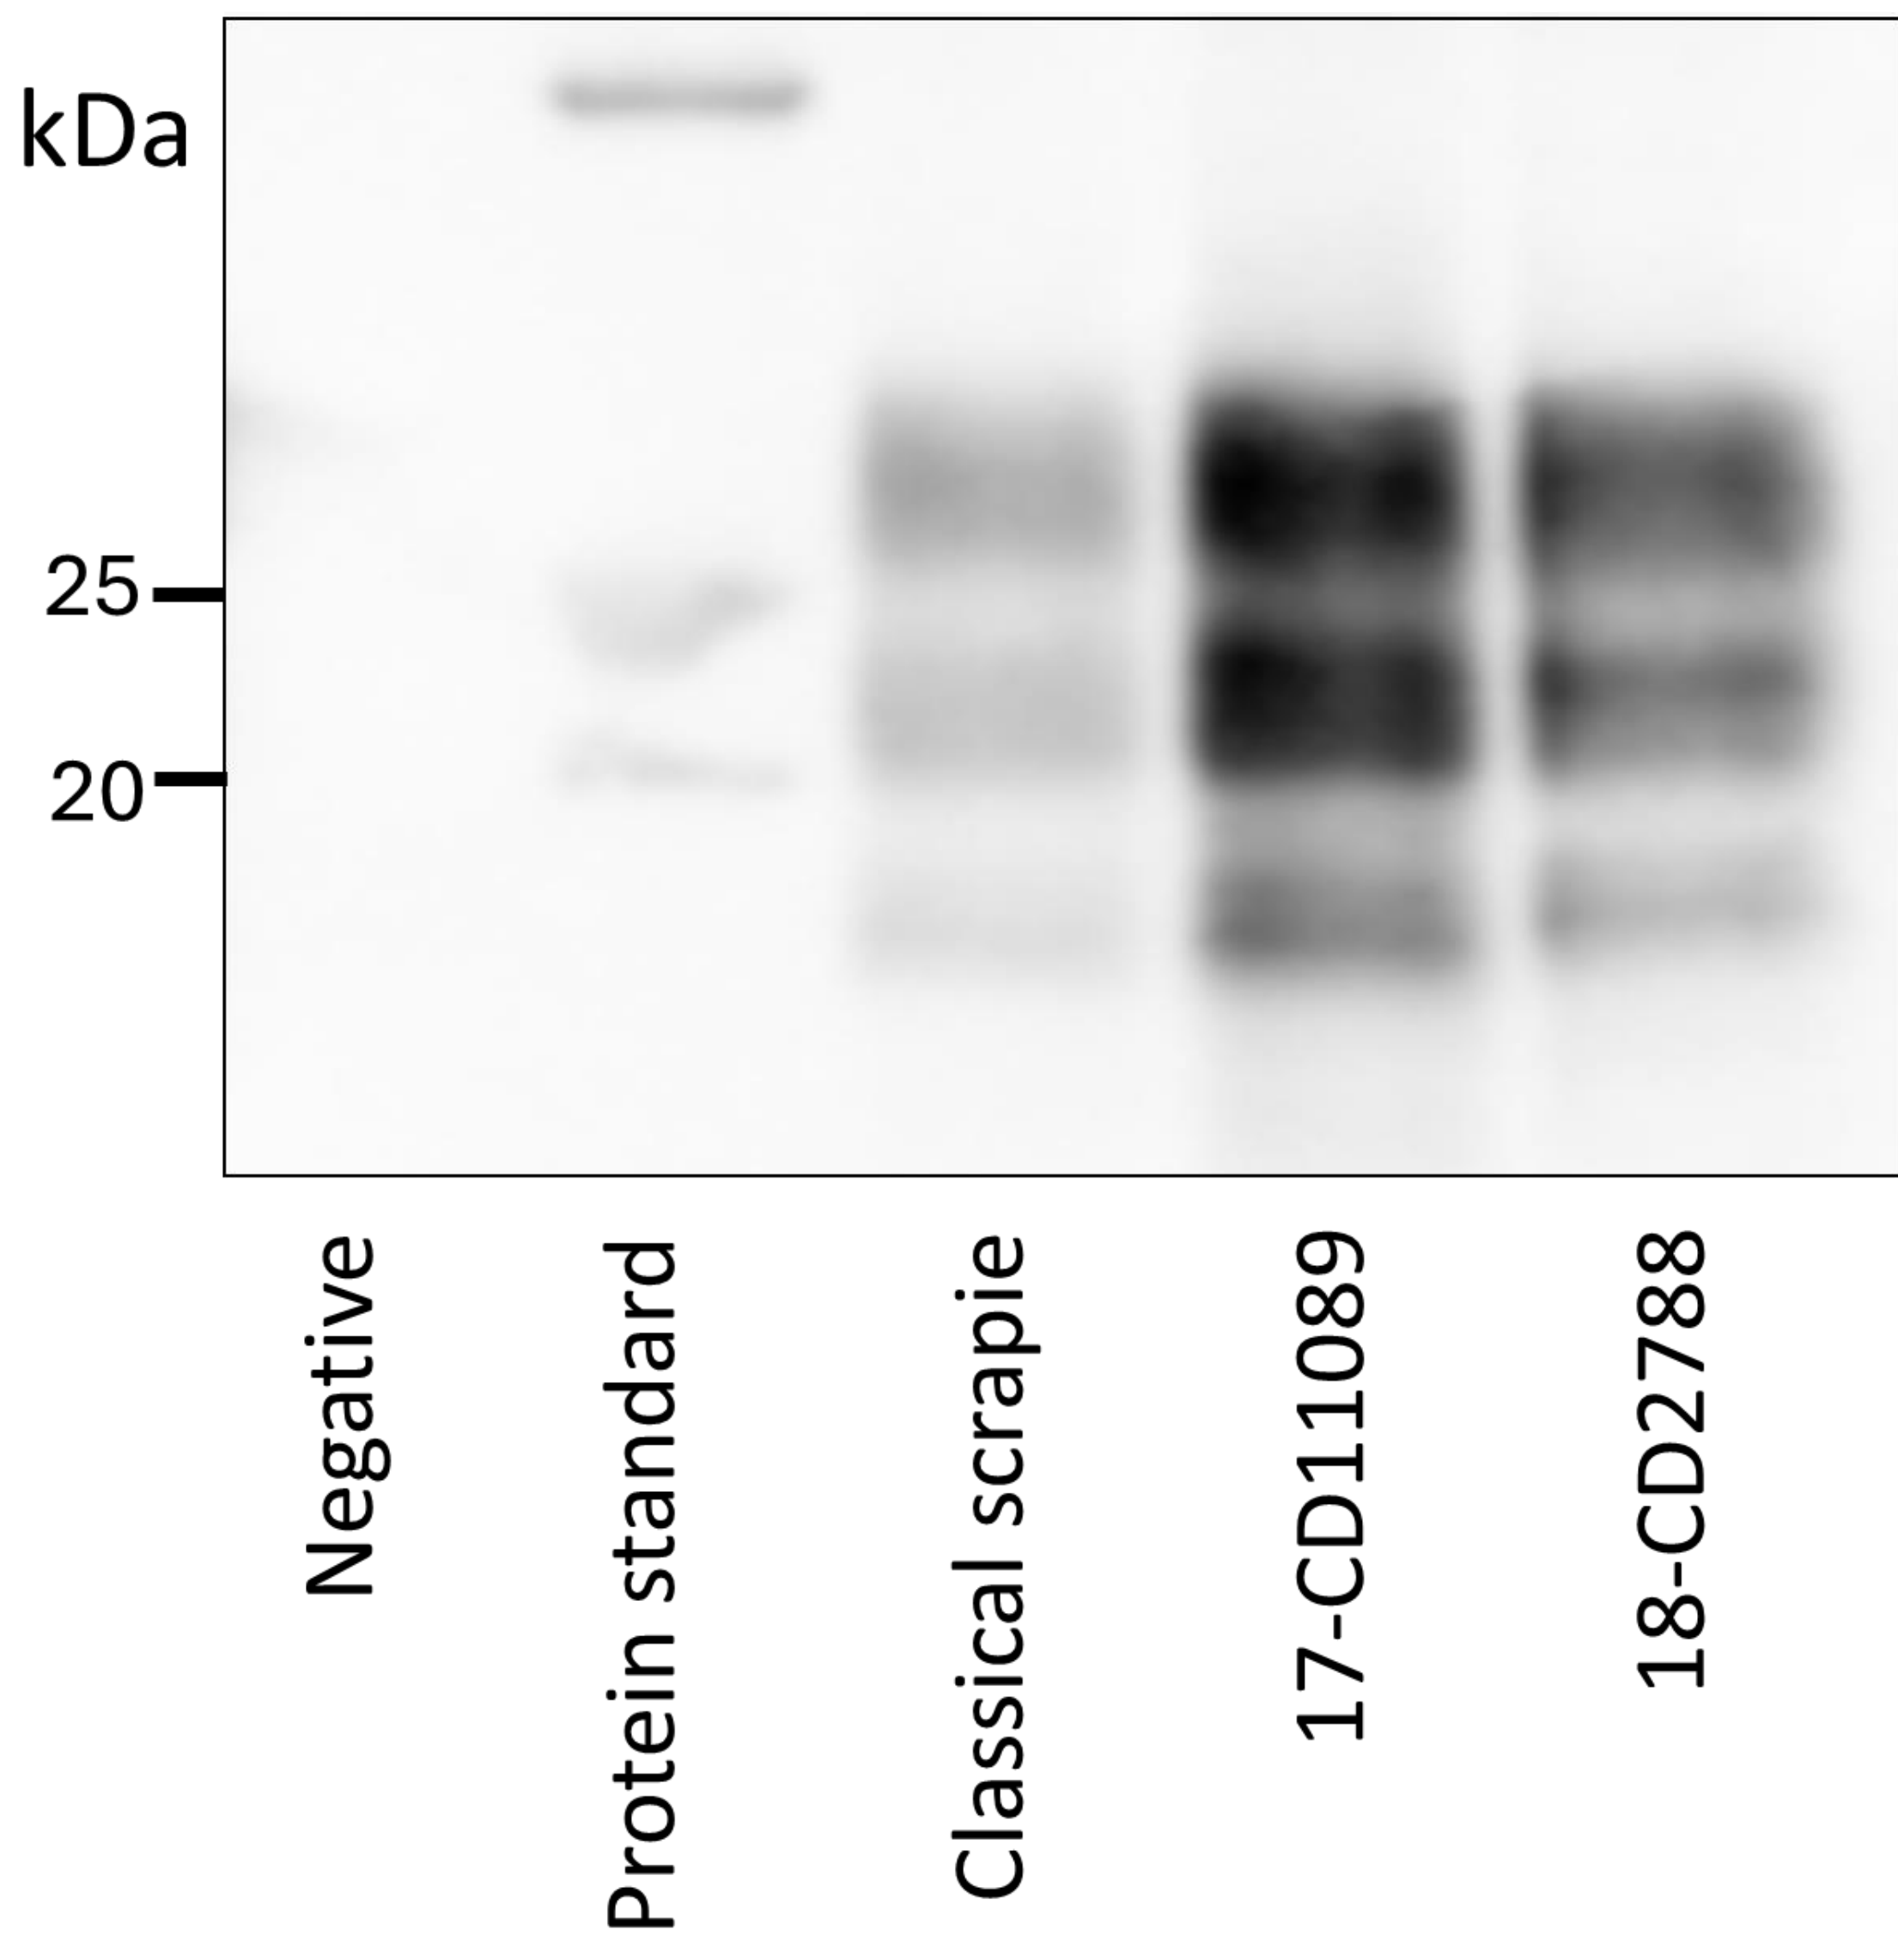

# B

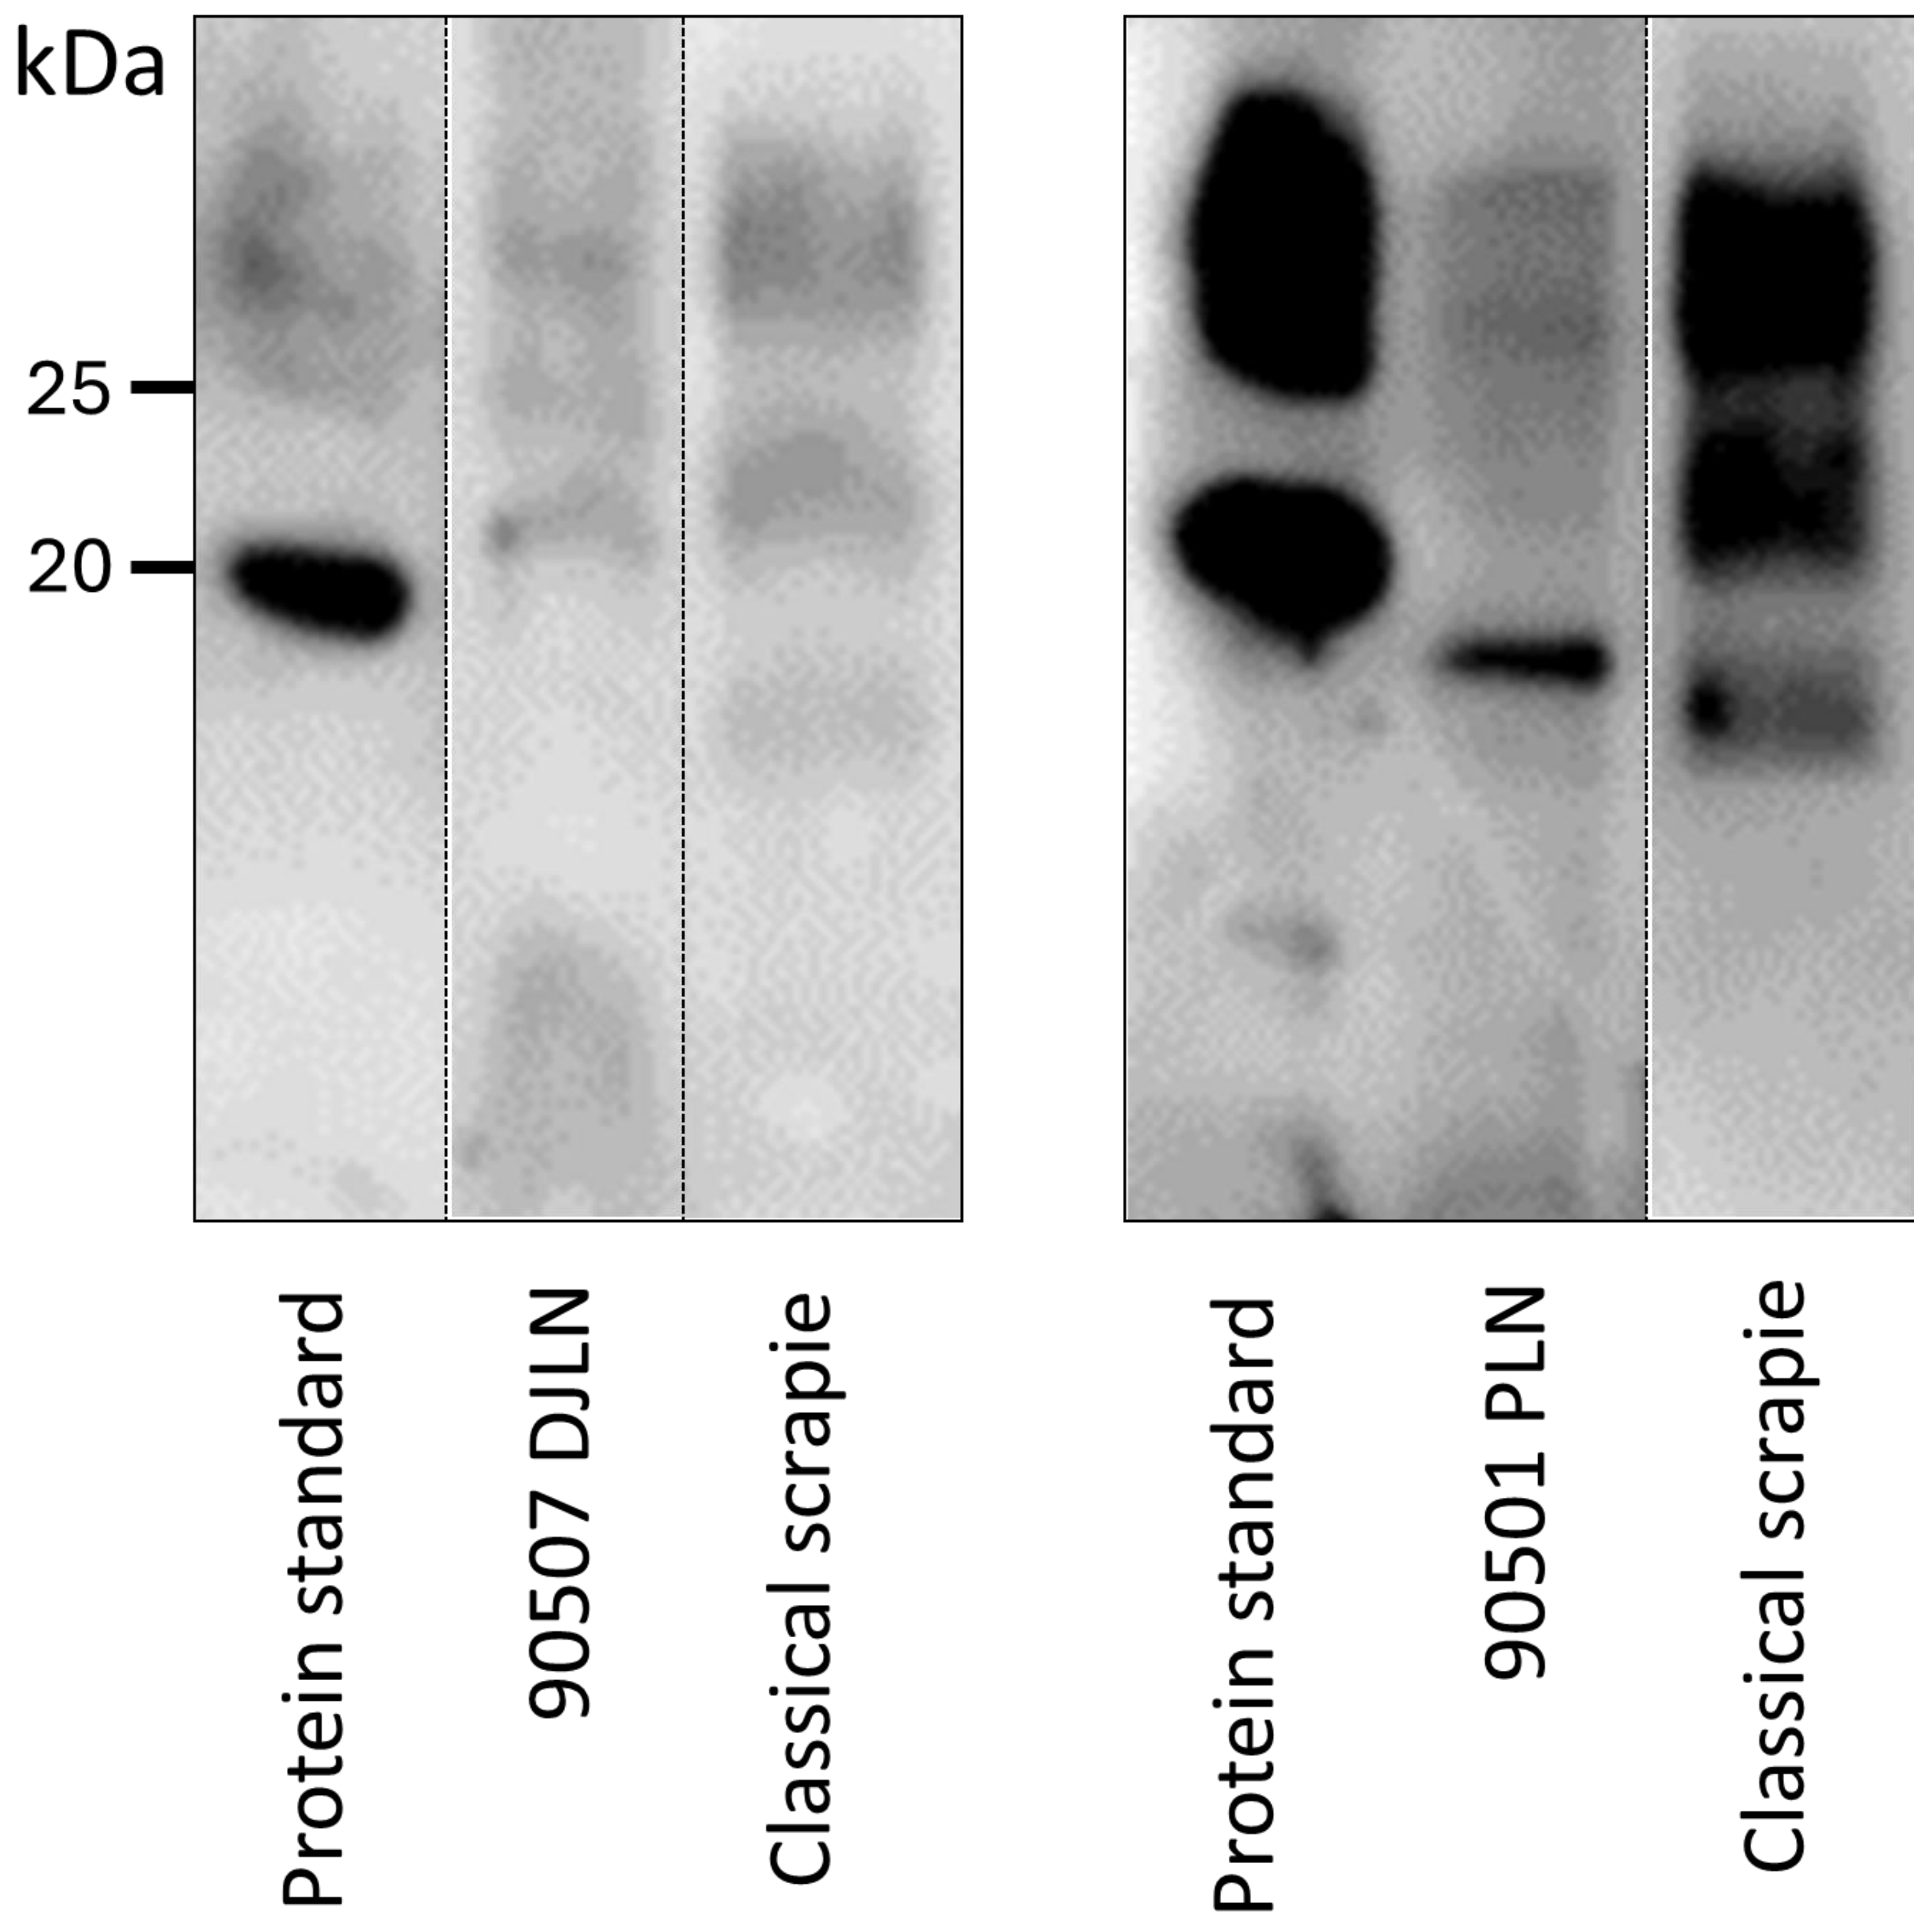

Supplement: MOESM8 [file 13567_2024_1350_MOESM8_ESM.pdf]
